# Supplementary material for: Proton conduction in a new 3-D open-framework vanadoborate with an abundant hydrogen bond system
Source: Royal Society of Chemistry journal article supplement (doi:10.1039/c7dt01334e), 2017-01-01
Supplement: c7dt01334e1.pdf [file c7dt01334e1.pdf]

Electronic Supplementary Information

**Proton conduction in a new 3-D open-framework vanadoborate  
with an abundant hydrogen bond system**

Xinxin Liu, Dan Zhang, Lingyun Li, Xuejiao Sun, Le Zhang and Hongming Yuan\*

State Key Laboratory of Inorganic Synthesis and Preparative Chemistry, College of  
Chemistry, Jilin University, Changchun 130012, P.R. China.

E-mail: [hmyuan@jlu.edu.cn](mailto:hmyuan@jlu.edu.cn); Fax: +86-0431-85168318

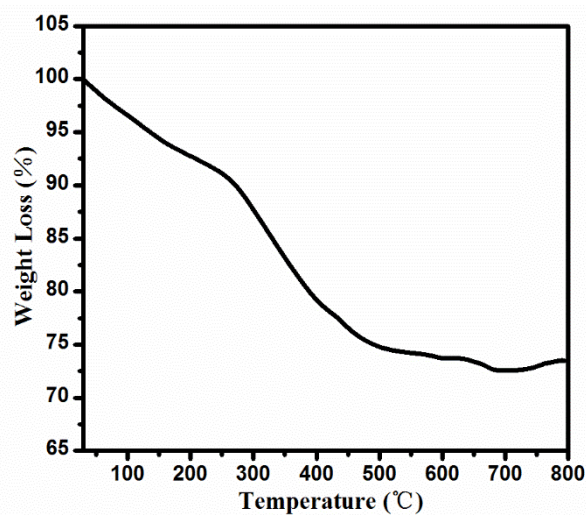

**Fig. S1.** TG curve of **1** in air.

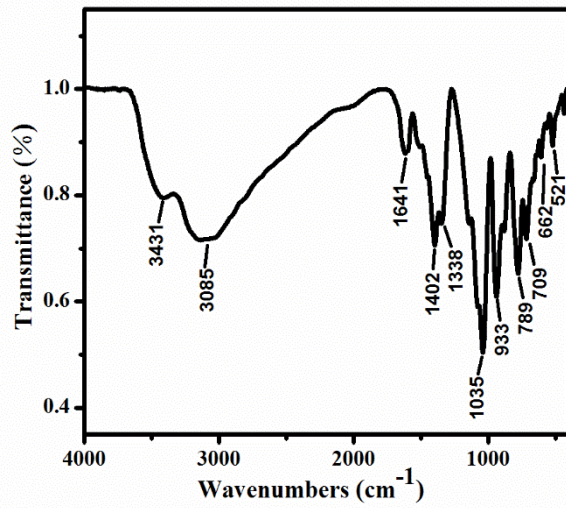

Fig. S2. The FT-IR spectrum of 1.

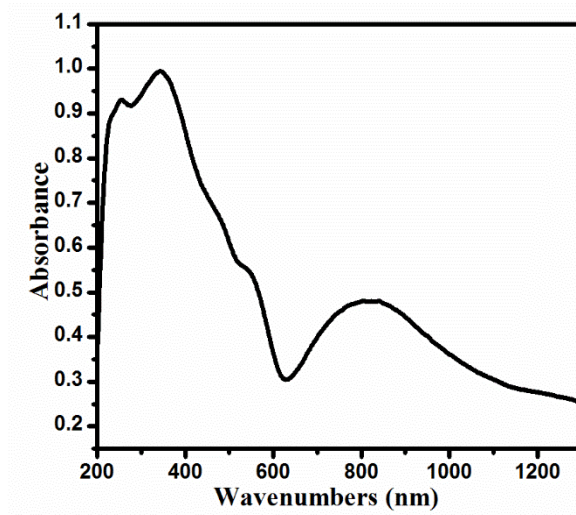

Fig. S3. UV-Vis-NIR diffuse reflectance spectrum of 1.

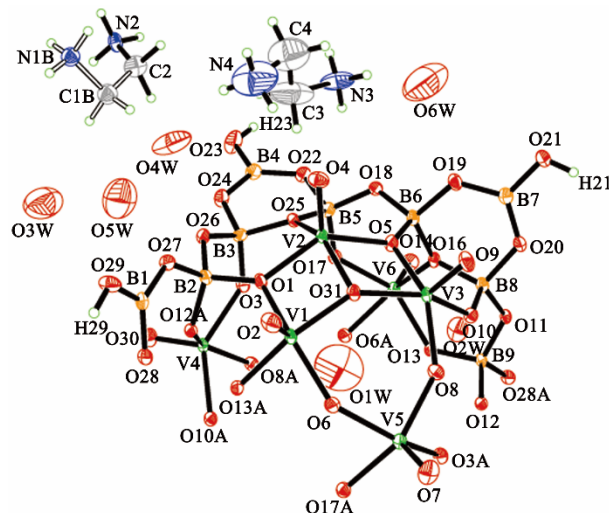

**Fig. S4.** The thermal ellipsoid plots (50% probability) and atomic labeling schemes of **1**.

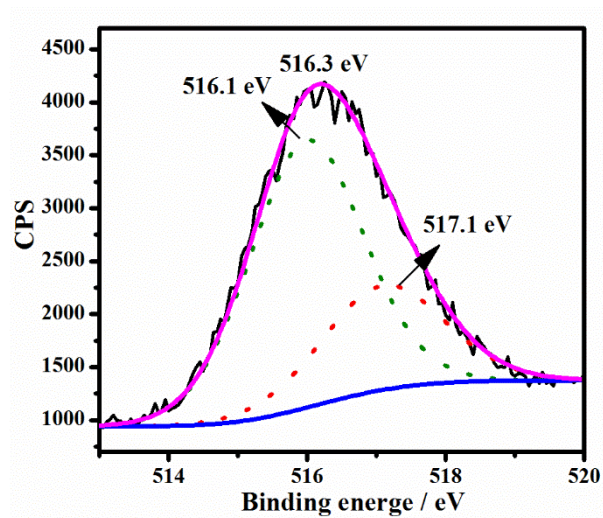

**Fig. S5.** XPS spectrum of vanadium in  $(\text{H}_2\text{en})_4\text{H}_2[\text{V}_{12}\text{B}_{18}\text{O}_{54}(\text{OH})_6(\text{H}_2\text{O})]\cdot 11\text{H}_2\text{O}$ . The peak at 516.1 eV is attributed to  $\text{V}^{4+}$  and a shoulder at about 517.1 eV is assigned to for  $\text{V}^{5+}$

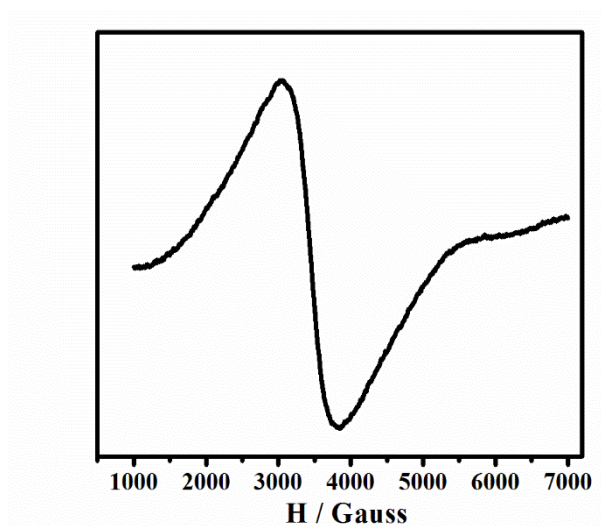

**Fig. S6.** EPR spectrum of **1**.

**Table S1.** Bond lengths [Å] for **1**.

|              |          |
|--------------|----------|
| V(1)-O(2)    | 1.628(3) |
| V(1)-O(31)   | 1.919(3) |
| V(1)-O(6)    | 1.920(3) |
| V(1)-O(1)    | 1.952(3) |
| V(1)-O(13)#1 | 1.950(3) |
| V(2)-O(4)    | 1.641(3) |
| V(2)-O(5)    | 1.924(3) |
| V(2)-O(1)    | 1.929(3) |
| V(2)-O(31)   | 1.940(3) |
| V(2)-O(25)   | 2.002(3) |
| V(3)-O(9)    | 1.627(3) |
| V(3)-O(8)    | 1.923(3) |
| V(3)-O(31)   | 1.922(3) |
| V(3)-O(5)    | 1.949(3) |
| V(3)-O(10)   | 1.964(3) |
| V(4)-O(30)   | 1.618(3) |
| V(4)-O(3)    | 1.933(3) |
| V(4)-O(8)#1  | 1.950(3) |
| V(4)-O(10)#1 | 1.957(3) |
| V(4)-O(12)#1 | 2.013(3) |
| V(5)-O(7)    | 1.626(3) |
| V(5)-O(6)    | 1.933(3) |
| V(5)-O(8)    | 1.933(3) |
| V(5)-O(3)#1  | 1.943(3) |

|              |           |
|--------------|-----------|
| V(5)-O(17)#1 | 1.960(3)  |
| V(6)-O(14)   | 1.627(3)  |
| V(6)-O(17)   | 1.931(3)  |
| V(6)-O(13)   | 1.938(3)  |
| V(6)-O(6)#1  | 1.952(3)  |
| V(6)-O(16)   | 1.994(3)  |
| B(1)-O(27)   | 1.341(5)  |
| B(1)-O(28)   | 1.374(6)  |
| B(1)-O(29)   | 1.377(5)  |
| B(2)-O(26)   | 1.427(5)  |
| B(2)-O(27)   | 1.474(5)  |
| B(2)-O(1)    | 1.476(5)  |
| B(2)-O(12)#1 | 1.519(5)  |
| B(3)-O(26)   | 1.430(5)  |
| B(3)-O(3)    | 1.468(5)  |
| B(3)-O(24)   | 1.488(5)  |
| B(3)-O(25)   | 1.516(5)  |
| B(4)-O(24)   | 1.360(6)  |
| B(4)-O(22)   | 1.356(6)  |
| B(4)-O(23)   | 1.376(6)  |
| B(5)-O(18)   | 1.428(5)  |
| B(5)-O(22)   | 1.475(5)  |
| B(5)-O(17)   | 1.478(5)  |
| B(5)-O(25)   | 1.524(5)  |
| B(6)-O(18)   | 1.423(5)  |
| B(6)-O(19)   | 1.481(5)  |
| B(6)-O(5)    | 1.480(5)  |
| B(6)-O(16)   | 1.522(5)  |
| B(7)-O(20)   | 1.352(6)  |
| B(7)-O(19)   | 1.357(6)  |
| B(7)-O(21)   | 1.380(6)  |
| B(8)-O(11)   | 1.435(5)  |
| B(8)-O(20)   | 1.474(5)  |
| B(8)-O(10)   | 1.484(5)  |
| B(8)-O(16)   | 1.512(5)  |
| B(9)-O(11)   | 1.429(5)  |
| B(9)-O(13)   | 1.474(5)  |
| B(9)-O(28)#1 | 1.500(5)  |
| B(9)-O(12)   | 1.508(5)  |
| O(21)-H(21)  | 0.8400    |
| O(23)-H(23)  | 0.7924    |
| O(29)-H(29)  | 0.8400    |
| C(1B)-C(2)   | 1.405(12) |
| C(1B)-N(1B)  | 1.501(14) |

|              |           |
|--------------|-----------|
| C(1B)-H(1B4) | 0.9900    |
| C(1B)-H(1B5) | 0.9900    |
| C(2)-N(2)    | 1.487(6)  |
| C(2)-H(2D)   | 0.9900    |
| C(2)-H(2E)   | 0.9900    |
| C(3)-C(4)    | 1.428(10) |
| C(3)-N(3)    | 1.599(10) |
| C(3)-H(3D)   | 0.9900    |
| C(3)-H(3E)   | 0.9900    |
| C(4)-N(4)    | 1.476(10) |
| C(4)-H(4D)   | 0.9900    |
| C(4)-H(4E)   | 0.9900    |
| N(1B)-H(1B1) | 0.9100    |
| N(1B)-H(1B2) | 0.9100    |
| N(1B)-H(1B3) | 0.9100    |
| N(2)-H(2A)   | 0.9100    |
| N(2)-H(2B)   | 0.9100    |
| N(2)-H(2C)   | 0.9100    |
| N(3)-H(3A)   | 0.9100    |
| N(3)-H(3B)   | 0.9100    |
| N(3)-H(3C)   | 0.9100    |
| N(4)-H(4A)   | 0.9100    |
| N(4)-H(4B)   | 0.9100    |
| N(4)-H(4C)   | 0.9100    |

**Table S1.** Bond angles [deg] for **1**.

|                    |            |
|--------------------|------------|
| O(2)-V(1)-O(31)    | 108.28(14) |
| O(2)-V(1)-O(6)     | 106.92(14) |
| O(31)-V(1)-O(6)    | 93.55(12)  |
| O(2)-V(1)-O(1)     | 108.87(14) |
| O(31)-V(1)-O(1)    | 77.66(11)  |
| O(6)-V(1)-O(1)     | 144.12(12) |
| O(2)-V(1)-O(13)#1  | 106.78(14) |
| O(31)-V(1)-O(13)#1 | 144.80(12) |
| O(6)-V(1)-O(13)#1  | 79.10(12)  |
| O(1)-V(1)-O(13)#1  | 88.32(12)  |
| O(4)-V(2)-O(5)     | 109.49(14) |
| O(4)-V(2)-O(1)     | 109.89(14) |
| O(5)-V(2)-O(1)     | 138.28(12) |
| O(4)-V(2)-O(31)    | 107.56(14) |
| O(5)-V(2)-O(31)    | 77.84(11)  |

|                      |            |
|----------------------|------------|
| O(1)-V(2)-O(31)      | 77.71(12)  |
| O(4)-V(2)-O(25)      | 107.32(14) |
| O(5)-V(2)-O(25)      | 90.63(11)  |
| O(1)-V(2)-O(25)      | 90.51(11)  |
| O(31)-V(2)-O(25)     | 145.11(12) |
| O(9)-V(3)-O(8)       | 108.00(14) |
| O(9)-V(3)-O(31)      | 106.47(14) |
| O(8)-V(3)-O(31)      | 94.23(12)  |
| O(9)-V(3)-O(5)       | 108.02(14) |
| O(8)-V(3)-O(5)       | 143.91(12) |
| O(31)-V(3)-O(5)      | 77.65(11)  |
| O(9)-V(3)-O(10)      | 106.44(14) |
| O(8)-V(3)-O(10)      | 78.39(11)  |
| O(31)-V(3)-O(10)     | 146.95(12) |
| O(5)-V(3)-O(10)      | 89.47(12)  |
| O(30)-V(4)-O(3)      | 109.86(14) |
| O(30)-V(4)-O(8)#1    | 108.69(14) |
| O(3)-V(4)-O(8)#1     | 78.28(12)  |
| O(30)-V(4)-O(10)#1   | 107.17(14) |
| O(3)-V(4)-O(10)#1    | 140.72(12) |
| O(8)#1-V(4)-O(10)#1  | 77.93(11)  |
| O(30)-V(4)-O(12)#1   | 106.31(14) |
| O(3)-V(4)-O(12)#1    | 89.86(11)  |
| O(8)#1-V(4)-O(12)#1  | 145.00(12) |
| O(10)#1-V(4)-O(12)#1 | 92.04(11)  |
| O(7)-V(5)-O(6)       | 106.81(15) |
| O(7)-V(5)-O(8)       | 108.09(15) |
| O(6)-V(5)-O(8)       | 92.21(12)  |
| O(7)-V(5)-O(3)#1     | 111.24(15) |
| O(6)-V(5)-O(3)#1     | 141.87(12) |
| O(8)-V(5)-O(3)#1     | 78.45(12)  |
| O(7)-V(5)-O(17)#1    | 108.09(15) |
| O(6)-V(5)-O(17)#1    | 78.07(12)  |
| O(8)-V(5)-O(17)#1    | 143.82(12) |
| O(3)#1-V(5)-O(17)#1  | 87.94(12)  |
| O(14)-V(6)-O(17)     | 107.97(14) |
| O(14)-V(6)-O(13)     | 108.46(14) |
| O(17)-V(6)-O(13)     | 141.26(12) |
| O(14)-V(6)-O(6)#1    | 107.42(14) |
| O(17)-V(6)-O(6)#1    | 78.33(12)  |
| O(13)-V(6)-O(6)#1    | 78.64(12)  |
| O(14)-V(6)-O(16)     | 107.49(14) |
| O(17)-V(6)-O(16)     | 91.26(12)  |
| O(13)-V(6)-O(16)     | 90.13(12)  |

|                    |            |
|--------------------|------------|
| O(6)#1-V(6)-O(16)  | 145.08(12) |
| O(27)-B(1)-O(28)   | 122.4(4)   |
| O(27)-B(1)-O(29)   | 117.7(4)   |
| O(28)-B(1)-O(29)   | 119.9(4)   |
| O(26)-B(2)-O(27)   | 107.6(3)   |
| O(26)-B(2)-O(1)    | 111.1(3)   |
| O(27)-B(2)-O(1)    | 108.5(3)   |
| O(26)-B(2)-O(12)#1 | 112.6(3)   |
| O(27)-B(2)-O(12)#1 | 109.2(3)   |
| O(1)-B(2)-O(12)#1  | 107.7(3)   |
| O(26)-B(3)-O(3)    | 110.3(3)   |
| O(26)-B(3)-O(24)   | 107.4(3)   |
| O(3)-B(3)-O(24)    | 109.0(3)   |
| O(26)-B(3)-O(25)   | 112.6(3)   |
| O(3)-B(3)-O(25)    | 108.0(3)   |
| O(24)-B(3)-O(25)   | 109.5(3)   |
| O(24)-B(4)-O(22)   | 122.7(4)   |
| O(24)-B(4)-O(23)   | 116.9(4)   |
| O(22)-B(4)-O(23)   | 120.4(4)   |
| O(18)-B(5)-O(22)   | 107.6(3)   |
| O(18)-B(5)-O(17)   | 110.7(3)   |
| O(22)-B(5)-O(17)   | 109.2(3)   |
| O(18)-B(5)-O(25)   | 113.4(3)   |
| O(22)-B(5)-O(25)   | 108.3(3)   |
| O(17)-B(5)-O(25)   | 107.6(3)   |
| O(18)-B(6)-O(19)   | 107.0(3)   |
| O(18)-B(6)-O(5)    | 111.7(3)   |
| O(19)-B(6)-O(5)    | 108.7(3)   |
| O(18)-B(6)-O(16)   | 112.9(3)   |
| O(19)-B(6)-O(16)   | 109.9(3)   |
| O(5)-B(6)-O(16)    | 106.5(3)   |
| O(20)-B(7)-O(19)   | 121.9(4)   |
| O(20)-B(7)-O(21)   | 120.9(4)   |
| O(19)-B(7)-O(21)   | 117.2(4)   |
| O(11)-B(8)-O(20)   | 106.4(3)   |
| O(11)-B(8)-O(10)   | 110.1(3)   |
| O(20)-B(8)-O(10)   | 109.7(3)   |
| O(11)-B(8)-O(16)   | 114.3(3)   |
| O(20)-B(8)-O(16)   | 107.6(3)   |
| O(10)-B(8)-O(16)   | 108.6(3)   |
| O(11)-B(9)-O(13)   | 111.1(3)   |
| O(11)-B(9)-O(28)#1 | 108.1(3)   |
| O(13)-B(9)-O(28)#1 | 107.8(3)   |
| O(11)-B(9)-O(12)   | 113.0(3)   |



|                     |            |
|---------------------|------------|
| O(13)-B(9)-O(12)    | 108.4(3)   |
| O(28)#1-B(9)-O(12)  | 108.3(3)   |
| B(2)-O(1)-V(2)      | 129.9(2)   |
| B(2)-O(1)-V(1)      | 128.4(2)   |
| V(2)-O(1)-V(1)      | 101.76(13) |
| B(3)-O(3)-V(4)      | 130.7(2)   |
| B(3)-O(3)-V(5)#1    | 127.7(2)   |
| V(4)-O(3)-V(5)#1    | 101.45(13) |
| B(6)-O(5)-V(2)      | 130.0(2)   |
| B(6)-O(5)-V(3)      | 128.1(2)   |
| V(2)-O(5)-V(3)      | 101.89(12) |
| V(1)-O(6)-V(5)      | 146.75(16) |
| V(1)-O(6)-V(6)#1    | 101.30(13) |
| V(5)-O(6)-V(6)#1    | 101.79(13) |
| V(3)-O(8)-V(5)      | 145.79(16) |
| V(3)-O(8)-V(4)#1    | 102.71(12) |
| V(5)-O(8)-V(4)#1    | 101.24(13) |
| B(8)-O(10)-V(4)#1   | 129.4(2)   |
| B(8)-O(10)-V(3)     | 128.6(2)   |
| V(4)#1-O(10)-V(3)   | 100.95(12) |
| B(9)-O(11)-B(8)     | 120.4(3)   |
| B(9)-O(12)-B(2)#1   | 114.5(3)   |
| B(9)-O(12)-V(4)#1   | 121.2(2)   |
| B(2)#1-O(12)-V(4)#1 | 121.4(2)   |
| B(9)-O(13)-V(6)     | 130.9(2)   |
| B(9)-O(13)-V(1)#1   | 128.4(2)   |
| V(6)-O(13)-V(1)#1   | 100.73(12) |
| B(8)-O(16)-B(6)     | 114.5(3)   |
| B(8)-O(16)-V(6)     | 122.5(2)   |
| B(6)-O(16)-V(6)     | 121.3(2)   |
| B(5)-O(17)-V(6)     | 129.7(2)   |
| B(5)-O(17)-V(5)#1   | 128.7(2)   |
| V(6)-O(17)-V(5)#1   | 101.59(13) |
| B(6)-O(18)-B(5)     | 120.2(3)   |
| B(7)-O(19)-B(6)     | 122.1(3)   |
| B(7)-O(20)-B(8)     | 123.0(3)   |
| B(7)-O(21)-H(21)    | 109.5      |
| B(4)-O(22)-B(5)     | 122.2(3)   |
| B(4)-O(23)-H(23)    | 111.1      |
| B(4)-O(24)-B(3)     | 121.3(3)   |
| B(3)-O(25)-B(5)     | 113.7(3)   |
| B(3)-O(25)-V(2)     | 121.7(2)   |
| B(5)-O(25)-V(2)     | 121.7(2)   |
| B(2)-O(26)-B(3)     | 120.2(3)   |

|                     |            |
|---------------------|------------|
| B(1)-O(27)-B(2)     | 122.0(3)   |
| B(1)-O(28)-B(9)#1   | 121.3(3)   |
| B(1)-O(29)-H(29)    | 109.5      |
| V(1)-O(31)-V(3)     | 144.67(16) |
| V(1)-O(31)-V(2)     | 102.59(13) |
| V(3)-O(31)-V(2)     | 102.26(12) |
| C(2)-C(1B)-N(1B)    | 105.2(10)  |
| C(2)-C(1B)-H(1B4)   | 110.7      |
| N(1B)-C(1B)-H(1B4)  | 110.7      |
| C(2)-C(1B)-H(1B5)   | 110.7      |
| N(1B)-C(1B)-H(1B5)  | 110.7      |
| H(1B4)-C(1B)-H(1B5) | 108.8      |
| C(1B)-C(2)-N(2)     | 125.3(7)   |
| N(2)-C(2)-H(2D)     | 110.7      |
| N(2)-C(2)-H(2E)     | 110.7      |
| H(2D)-C(2)-H(2E)    | 108.8      |
| C(4)-C(3)-N(3)      | 110.3(7)   |
| C(4)-C(3)-H(3D)     | 109.6      |
| N(3)-C(3)-H(3D)     | 109.6      |
| C(4)-C(3)-H(3E)     | 109.6      |
| N(3)-C(3)-H(3E)     | 109.6      |
| H(3D)-C(3)-H(3E)    | 108.1      |
| C(3)-C(4)-N(4)      | 104.9(7)   |
| C(3)-C(4)-H(4D)     | 110.8      |
| N(4)-C(4)-H(4D)     | 110.8      |
| C(3)-C(4)-H(4E)     | 110.8      |
| N(4)-C(4)-H(4E)     | 110.8      |
| H(4D)-C(4)-H(4E)    | 108.8      |
| C(1B)-N(1B)-H(1B1)  | 109.5      |
| C(1B)-N(1B)-H(1B2)  | 109.5      |
| H(1B1)-N(1B)-H(1B2) | 109.5      |
| C(1B)-N(1B)-H(1B3)  | 109.5      |
| H(1B1)-N(1B)-H(1B3) | 109.5      |
| H(1B2)-N(1B)-H(1B3) | 109.5      |
| C(2)-N(2)-H(2A)     | 109.5      |
| C(2)-N(2)-H(2B)     | 109.5      |
| H(2A)-N(2)-H(2B)    | 109.5      |
| C(2)-N(2)-H(2C)     | 109.5      |
| H(2A)-N(2)-H(2C)    | 109.5      |
| H(2B)-N(2)-H(2C)    | 109.5      |
| C(3)-N(3)-H(3A)     | 109.5      |
| C(3)-N(3)-H(3B)     | 109.5      |
| H(3A)-N(3)-H(3B)    | 109.5      |
| C(3)-N(3)-H(3C)     | 109.5      |

|                  |       |
|------------------|-------|
| H(3A)-N(3)-H(3C) | 109.5 |
| H(3B)-N(3)-H(3C) | 109.5 |
| C(4)-N(4)-H(4A)  | 109.5 |
| C(4)-N(4)-H(4B)  | 109.5 |
| H(4A)-N(4)-H(4B) | 109.5 |
| C(4)-N(4)-H(4C)  | 109.5 |
| H(4A)-N(4)-H(4C) | 109.5 |
| H(4B)-N(4)-H(4C) | 109.5 |

Symmetry transformations used to generate equivalent atoms:

#1  $-x+1/2, -y+3/2, -z+1$
